# Supplementary material for: Definition of a novel breast tumor-specific classifier based on secretome analysis
Source: Springer Nature journal article supplement (doi:10.1186/s13058-022-01590-4), 2022-12-20
Supplement: MOESM2 [file 23846590]

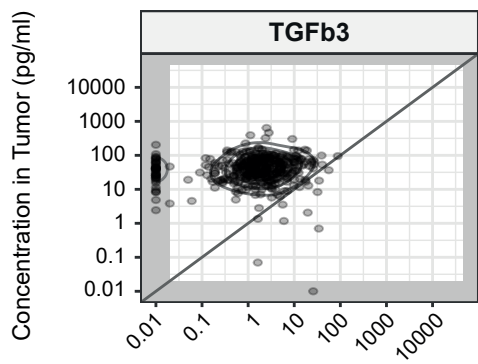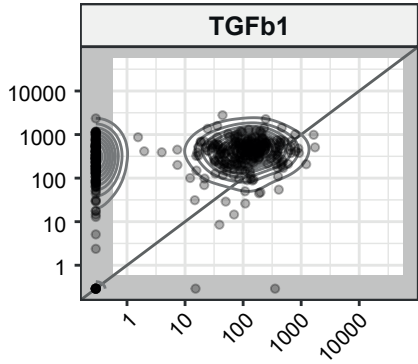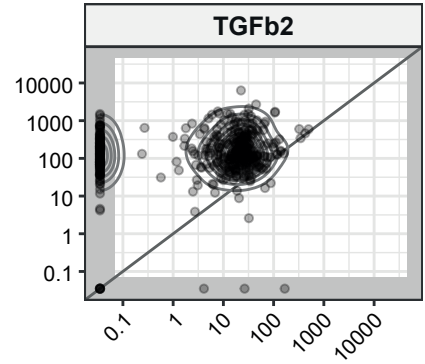

Concentration in Juxta-Tumor (pg/ml)
